# Supplementary material for: Unveiling the Antiviral Efficacy of Forskolin: A Multifaceted In Vitro and In Silico Approach
Source: MDPI journal article supplement (doi:10.3390/molecules29030704), 2024-02-03
Supplement: s1 [file s1]

## Supplementary Material

### Unveiling the Antiviral Efficacy of Forskolin: A Multifaceted In Vitro and In Silico Approach

Yhiya Amen <sup>1,\*</sup>, Mohamed A Selim <sup>2</sup>, Reda A. Suef <sup>2</sup>, Ahmed M. Sayed <sup>3,4</sup>, Ahmed Othman <sup>5,\*</sup>

<sup>1</sup> Department of Pharmacognosy, Faculty of Pharmacy, Mansoura University, Mansoura 35516, Egypt

<sup>2</sup> Botany and Microbiology Department, Faculty of Science, Al-Azhar University, Cairo 11884, Egypt; mohamedselim@azhar.edu.eg (M.A.S.); redasuef@azhar.edu.eg (R.A.S.)

<sup>3</sup> Department of Pharmacognosy, Collage of Pharmacy, Almaaqal University, Basra 61014, Iraq; ahmed.mohamed.sayed@nub.edu.eg

<sup>4</sup> Department of Pharmacognosy, Faculty of Pharmacy, Nahda University, Beni-Suef 62513, Egypt

<sup>5</sup> Department of Pharmacognosy and Medicinal Plants, Faculty of Pharmacy, Al-Azhar University, Cairo 11884, Egypt

\* Correspondence: yhiaamen@mans.edu.eg (Y.A.); ah.othman@azhar.edu.eg (A.O.)

**Abstract:** *Coleus forskohlii* (Willd.) Briq. is a medicinal herb of the Lamiaceae family. It is native to India and widely present in tropical and sub-tropical regions of Egypt, China, Ethiopia, and Pakistan. The roots of *C. forskohlii* are edible, rich with pharmaceutically bioactive compounds, and traditionally reported to treat a variety of diseases, including inflammation, respiratory disorders, obesity, and viral ailments. Notably, the emergence of viral diseases is expected to quickly spread; consequently, these data impose a need for various approaches to develop broad active therapeutics for utilization in the management of future viral infection outbreaks. In this study, the naturally occurring labdane diterpenoid derivative, forskolin, was obtained from *Coleus forskohlii*. Additionally, we evaluated the antiviral potential of forskolin towards three viruses, namely herpes simplex viruses 1 and 2 (HSV-1 and HSV-2), hepatitis A virus (HAV), and coxsackievirus B4 (COX-B4). We observed that forskolin displayed antiviral activity against HAV, COX-B4, HSV-1, HSV-2 with IC<sub>50</sub> values of 62.9, 73.1, 99.0, and 106.0 µg/mL, respectively. Furthermore, we explored the forskolin's potential antiviral target using PharmMapper, a pharmacophore-based virtual screening platform. Forskolin's modeled structure was analyzed to identify potential protein targets linked to its antiviral activity, with results ranked based on Fit scores. Cathepsin L (PDB ID: 3BC3) emerged as a top-scoring hit, prompting further exploration through molecular docking and MD simulations. Our analysis revealed that forskolin's binding mode within cathepsin L's active site, characterized by stable hydrogen bonding and hydrophobic interactions, mirrors that of a co-crystallized inhibitor. These findings, supported by consistent RMSD profiles and similar binding free energies, suggest forskolin's potential in inhibiting cathepsin L, highlighting its promise as an antiviral agent.

**Keywords:** *Coleus forskohlii*; Forskolin; HAV; COX-B4; HSV-1; HSV-2; Virtual screening, MD simulation, Cathepsin L.

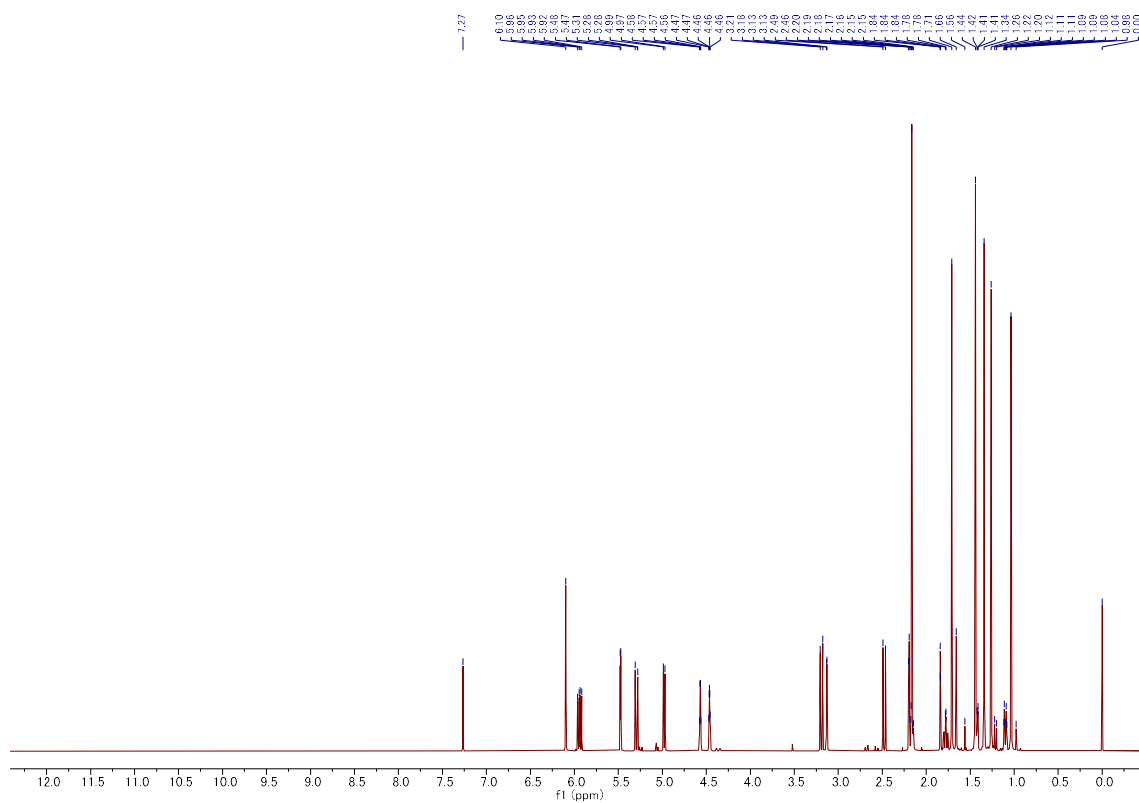

**Figure S1:**  $^1\text{H}$ -NMR analysis of C1 (600 MHz,  $\text{CDCl}_3$ )

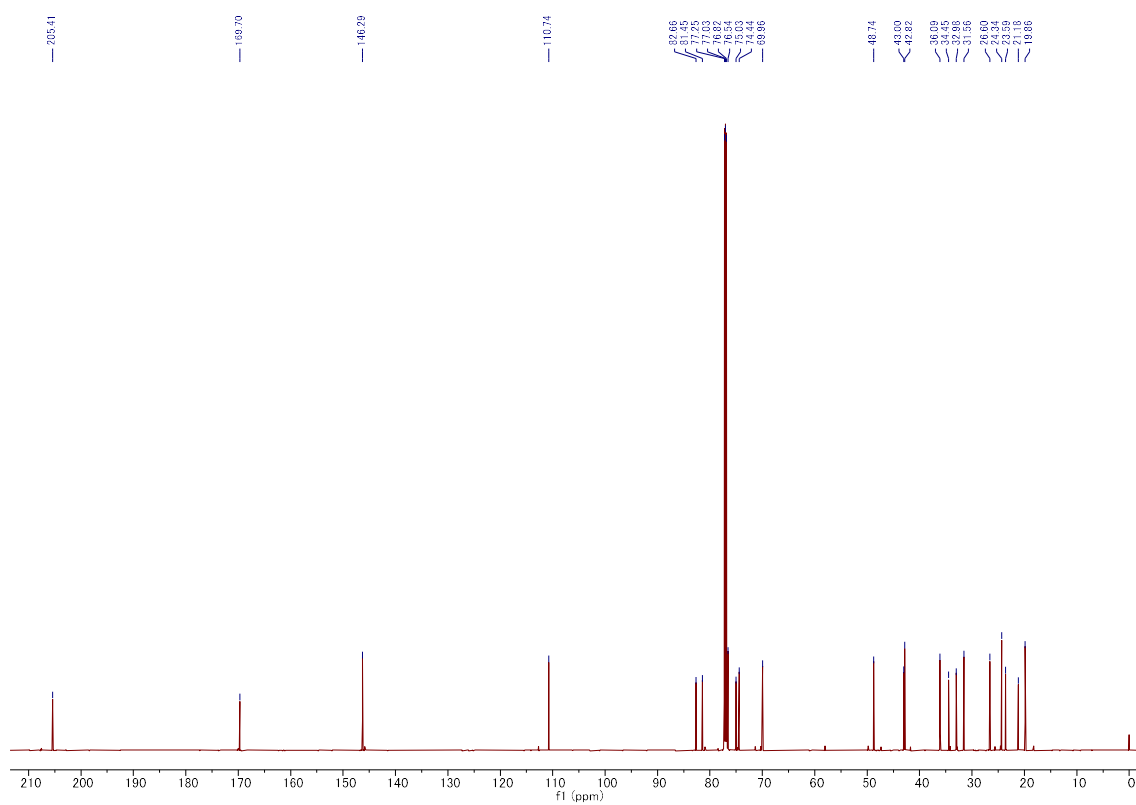

**Figure S2:**  $^{13}\text{C}$ -NMR analysis of C1 (150 MHz,  $\text{CDCl}_3$ )

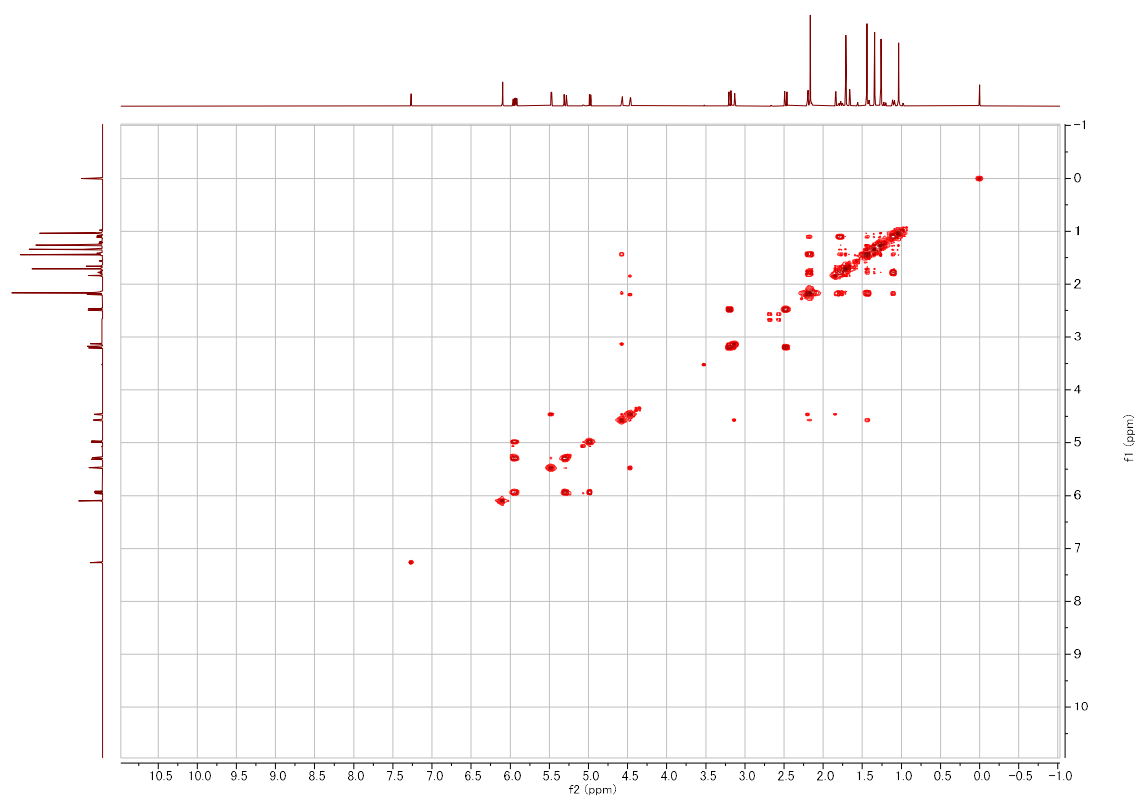

**Figure S3:** COSY spectrum of C1

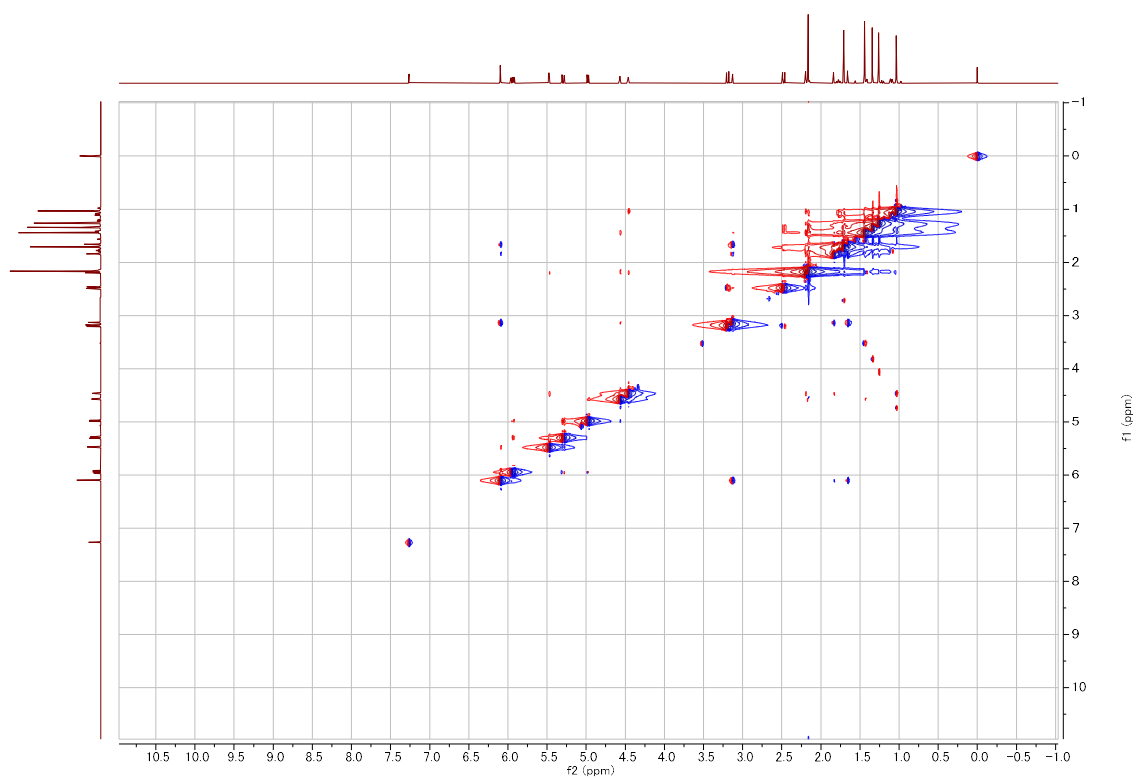

**Figure S4:** NOESY spectrum of C1

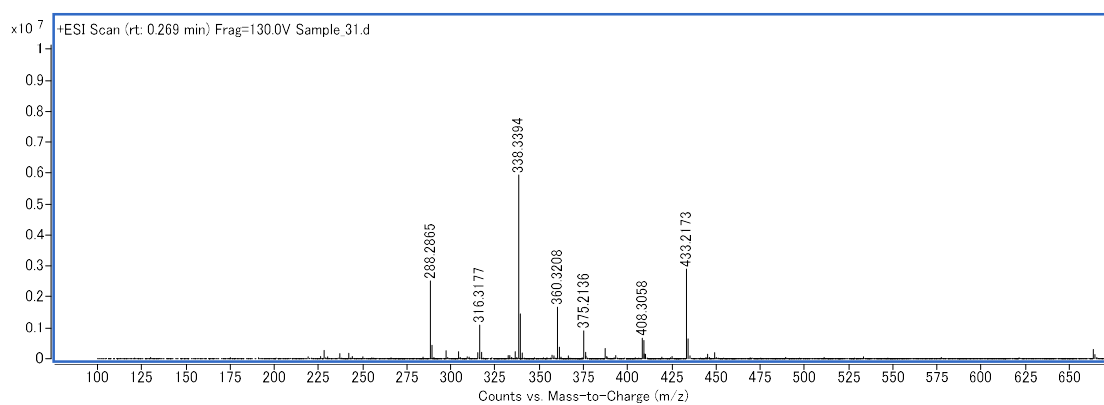

**Figure S5:** HR-ESI-MS spectrum of C1

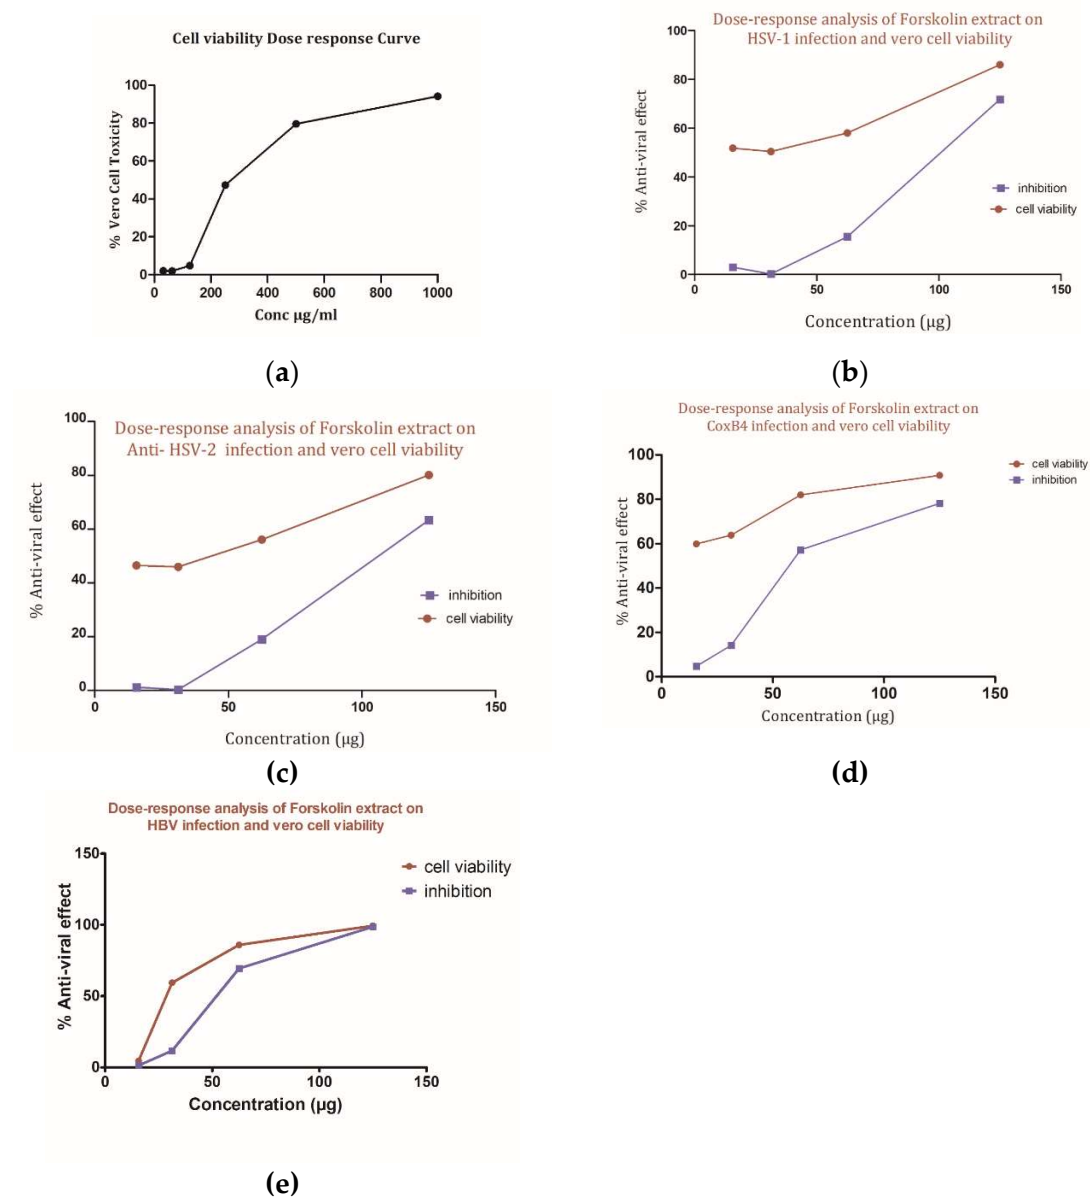

**Figure S6:** (a) Dose response analysis representation of the cytotoxic effect of different concentrations of Forskolin for 48 hour against Vero cell line growth; (b) Measurement of the efficacy and potency of forskolin extract with different concentrations as an anti- HSV-1 agent; (c) Measurement of the efficacy and potency of forskolin extract with different concentrations as an anti- HSV-2 agent; (d) Measurement of the efficacy and potency of forskolin extract with different concentrations as an anti- CoxB4 agent; (e) Percent of inhibition measurement of HAV exposed to four concentrations of forskolin extract.

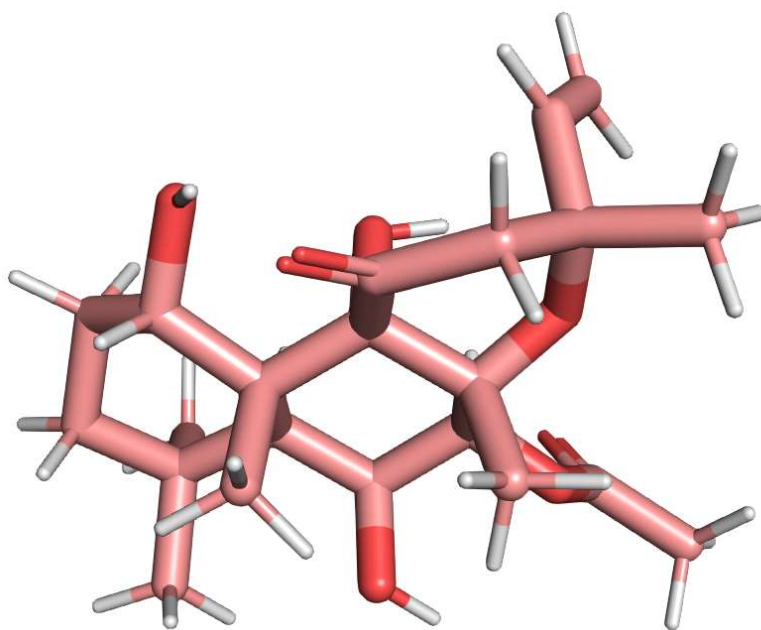

**Figure S7.** The energy-minimized forskolin structure that was used for the virtual screening and docking experiments as well as the MD simulations.

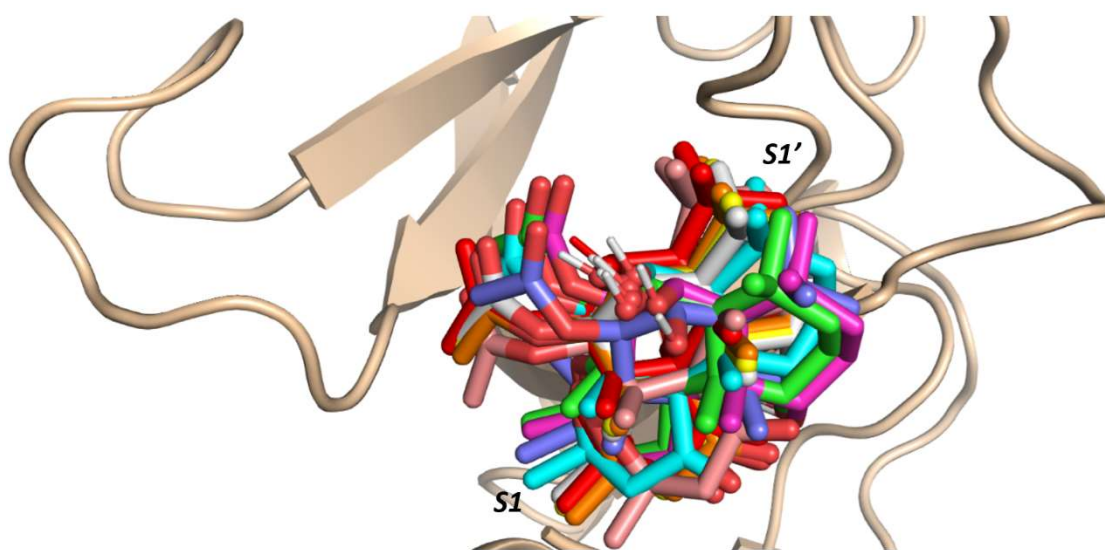

**Figure S8.** The generated 10 binding poses of forskolin inside the active site of Cathepsin L (PDB ID 3BC3). The 10 generated poses were almost of the same orientations with slight differences. They occupied the S1 and S1' subunits of the Cathepsin L's active site. The RMSD between the best-scoring pose the worst-scoring one was 3.2 Å.

**Table S1.**  $^1\text{H}$  and  $^{13}\text{C}$ -NMR Spectral Data of Forskolin.

| #  | $^1\text{H}$ (multiplicity, $J$ in Hz) | $^{13}\text{C}$ |
|----|----------------------------------------|-----------------|
| 1  |                                        | 74.4            |
| 2  |                                        | 26.6            |
| 3  |                                        | 36.1            |
| 4  |                                        | 34.5            |
| 5  |                                        | 42.8            |
| 6  | 4.5 (1H, brs)                          | 70.0            |
| 7  | 5.28 (1H, d, $J = 16.3$ )              | 76.5            |
| 8  |                                        | 81.5            |
| 9  |                                        | 82.7            |
| 10 |                                        | 43.0            |
| 11 |                                        | 205.4           |
| 12 |                                        | 48.7            |
| 13 |                                        | 75.0            |
| 14 | 5.87 (1H, dd, $J = 10.6, 17.2$ Hz)     | 146.3           |
| 15 | 4.91 (1H, d, $J = 10.9$ )              | 110.7           |
|    | 5.40 (1H, d, $J = 17.2$ )              |                 |
| 16 | 1.34                                   | 31.6            |
| 17 | 1.71                                   | 23.6            |
| 18 | 1.04                                   | 33.0            |
| 19 | 1.26                                   | 24.3            |
| 20 | 1.44                                   | 19.9            |
| 21 |                                        | 169.7           |
| 22 | 2.16                                   | 21.2            |



**Table S2:** Cytotoxic activity of Vero cell line exposed to different concentrations of Forskolin for 48 h. The results are presented as percentage (mean  $\pm$  SD). Cell viability was evaluated by MMT assay.

| Plant extract         |                           | Cell proliferation (Cytotoxicity % VS Control) |      |       |       |       |       |       |
|-----------------------|---------------------------|------------------------------------------------|------|-------|-------|-------|-------|-------|
|                       |                           | Vero Cell Line                                 |      |       |       |       |       |       |
| Conc $\mu\text{g/ml}$ | Denotation                | Control                                        | 1000 | 500   | 250   | 125   | 62.5  | 31.25 |
| Forskolin             | Mean O.D                  | 0.7                                            | 0.04 | 0.14  | 0.37  | 0.66  | 0.68  | 0.68  |
|                       | $\pm$ SD                  | 0                                              | 0    | 0.01  | 0.01  | 0.01  | 0     | 0.01  |
|                       | % Viability               | 100                                            | 5.8  | 20.38 | 52.71 | 95.25 | 98.03 | 97.99 |
|                       | % Toxicity                | 0                                              | 94.2 | 79.62 | 47.29 | 4.75  | 1.97  | 2.01  |
|                       | CC <sub>50</sub> $\pm$ SD | 322.1 $\pm$ 9.58                               |      |       |       |       |       |       |
|                       | MNTC                      |                                                |      |       |       |       |       |       |
|                       | $\mu\text{g/ml}$          | 125                                            |      |       |       |       |       |       |

**Table S3:** Measurement of the efficacy and potency of forskolin extract with different concentrations as an anti-**HSV-1** agent.

| Plant extract         |                           | Cell | virus | Anti- HSV-1 Effect of Forskolin |       |       |       |
|-----------------------|---------------------------|------|-------|---------------------------------|-------|-------|-------|
| Conc $\mu\text{g/ml}$ | Denotation                | Vero | HSV-1 | 125                             | 62.5  | 31.25 | 15.62 |
| Forskolin             | Mean O.D                  | 0.71 | 0.36  | 0.61                            | 0.41  | 0.36  | 0.37  |
|                       | $\pm$ SD                  | 0    | 0     | 0.01                            | 0.01  | 0     | 0     |
|                       | % Viability               | 100  | 50.28 | 85.98                           | 57.98 | 50.38 | 51.75 |
|                       | % Toxicity                | -    | 49.72 | 14.02                           | 42.02 | 49.62 | 48.25 |
|                       | % HSV-1 Activity          | -    | 100   | 28.21                           | 84.52 | 99.81 | 97.06 |
|                       | % Anti-viral effect       | -    | 0     | 71.79                           | 15.48 | 0.19  | 2.94  |
|                       | IC <sub>50</sub> $\pm$ SD |      |       | 99.083                          |       |       |       |

**Table S4:** Measurement of the efficacy and potency of forskolin extract with different concentrations as an anti-**HSV-2** agent.

| Plant extract         |                           | Cell | virus | Anti- HSV-2 Effect of Forskolin |       |       |       |
|-----------------------|---------------------------|------|-------|---------------------------------|-------|-------|-------|
| Conc $\mu\text{g/ml}$ | Denotation                | Vero | HSV-2 | 125                             | 62.5  | 31.25 | 15.62 |
| Forskolin             | Mean O.D                  | 0.71 | 0.36  | 0.57                            | 0.4   | 0.32  | 0.33  |
|                       | $\pm$ SD                  | 0    | 0     | 0                               | 0     | 0     | 0     |
|                       | % Viability               | 100  | 50.28 | 80.12                           | 56.09 | 45.94 | 46.46 |
|                       | % Toxicity                | -    | 49.72 | 19.88                           | 43.91 | 54.06 | 53.54 |
|                       | % HSV-1 Activity          | -    | 100   | 36.67                           | 81.01 | 99.74 | 98.78 |
|                       | % Anti-viral effect       | -    | 0     | 63.33                           | 18.99 | 0.26  | 1.22  |
|                       | IC <sub>50</sub> $\pm$ SD |      |       | 106.01                          |       |       |       |

**Table S5:** Measurement of the efficacy and potency of forskolin extract with different concentrations as an anti-CoxB4 agent.

| Plant extract         |                           | Cell | virus | Anti- CoxB4 Effect of Forskolin |       |       |       |
|-----------------------|---------------------------|------|-------|---------------------------------|-------|-------|-------|
| Conc $\mu\text{g/ml}$ | Denotation                | Vero | CoxB4 | 125                             | 62.5  | 31.25 | 15.62 |
| Forskolin             | Mean O.D                  | 0.71 | 0.41  | 0.64                            | 0.58  | 0.45  | 0.42  |
|                       | $\pm$ SD                  | 0    | 0.01  | 0.01                            | 0.01  | 0.01  | 0     |
|                       | % Viability               | 100  | 57.88 | 90.79                           | 81.96 | 63.83 | 59.87 |
|                       | % Toxicity                | -    | 42.12 | 9.21                            | 18.04 | 36.17 | 40.13 |
|                       | % HSV-1 Activity          |      | 100   | 21.86                           | 42.83 | 85.87 | 95.29 |
|                       | % Anti-viral effect       |      | 0     | 78.14                           | 57.17 | 14.13 | 4.71  |
|                       | IC <sub>50</sub> $\pm$ SD |      |       | 73.17                           |       |       |       |

**Table S6:** Percent of inhibition measurement of HAV exposed to four concentrations of forskolin extract.

| Plant extract         |                           | Cell | virus | Anti- HAV Effect of Forskolin |       |       |       |
|-----------------------|---------------------------|------|-------|-------------------------------|-------|-------|-------|
| Conc $\mu\text{g/ml}$ | Denotation                | Vero | HAV   | 125                           | 62.5  | 31.25 | 15.62 |
| Forskolin             | Mean O.D                  | 0.71 | 0.38  | 0.70                          | 0.61  | 0.42  | 0.39  |
|                       | $\pm$ SD                  | 0    | 0.01  | 0.01                          | 0.01  | 0.01  | 0.00  |
|                       | % Viability               | 100  | 53.9  | 99.34                         | 85.93 | 59.35 | 4.58  |
|                       | % Toxicity                | 0    | 46.03 | 0.66                          | 14.07 | 40.65 | 5.42  |
|                       | % HSV-1 Activity          | -    | 100   | 1.44                          | 30.56 | 88.31 | 98.67 |
|                       | % Anti-viral effect       | -    | 0     | 98.66                         | 69.44 | 11.69 | 1.33  |
|                       | IC <sub>50</sub> $\pm$ SD |      |       | 62.986                        |       |       |       |

**Table S7.** The PharmMapper results ranked from the highest to the lowest protein hits in terms of Fit-scores.

| Rank | PDB ID | Fit-Score | Target Name                                                 |
|------|--------|-----------|-------------------------------------------------------------|
| 1    | 2ct7   | 19.46     | RING finger protein 31                                      |
| 2    | 1evy   | 17.86     | Glycerol-3-phosphate dehydrogenase [NAD+], glycosomal       |
| 3    | 3bc3   | 16.81     | S subsites of cathepsin L                                   |
| 4    | 1roz   | 14.59     | Deoxyhypusine synthase                                      |
| 5    | 1f9u   | 14.39     | Kinesin-like protein KAR3                                   |
| 6    | 1n8w   | 14.19     | Malate synthase G                                           |
| 7    | 1n8z   | 13.79     | Receptor tyrosine-protein kinase erbB-2                     |
| 8    | 2ify   | 12.58     | 2,3-bisphosphoglycerate-independent phosphoglycerate mutase |
| 9    | 1uyr   | 12.2      | Acetyl-CoA carboxylase                                      |
| 10   | 2gqf   | 11.85     | Uncharacterized protein HI0933                              |
| 11   | 2yxr   | 11.77     | Preprotein translocase subunit secY                         |
| 12   | 2c36   | 11.76     | Glycoprotein D                                              |
| 13   | 2e8x   | 11.69     | Geranylgeranyl pyrophosphate synthetase                     |
| 14   | 2i15   | 11.47     | Uncharacterized protein MG296 homolog                       |
| 15   | 1g7s   | 10.71     | Probable translation initiation factor IF-2                 |
| 16   | 1w1g   | 10.7      | 3-phosphoinositide-dependent protein kinase 1               |
| 17   | 3g7g   | 10.7      | UPF0311 protein CA_C3321                                    |
| 18   | 1sh4   | 10.44     | Cytochrome b5                                               |
| 19   | 2hz7   | 10.38     | Glutaminyl-tRNA synthetase                                  |
| 20   | 1wvc   | 10.36     | Glucose-1-phosphate cytidyltransferase                      |
| 21   | 1qrj   | 10.23     | Gag-Pro-Pol polyprotein                                     |
| 22   | 3dwl   | 10.23     | Actin-related protein 3                                     |
| 23   | 1nda   | 10.15     | Trypanothione reductase                                     |

|    |      |       |                                                                              |
|----|------|-------|------------------------------------------------------------------------------|
| 24 | 1w5a | 9.926 | Cell division protein ftsZ homolog 1                                         |
| 25 | 3ffv | 9.857 | Protein syd                                                                  |
| 26 | 1lj0 | 9.748 | Cytochrome b5 type B                                                         |
| 27 | 2nr0 | 9.445 | tRNA pseudouridine synthase A                                                |
| 28 | 1ujv | 9.415 | Membrane-associated guanylate kinase, WW and PDZ domain-containing protein 2 |
| 29 | 2ix4 | 9.292 | 3-oxoacyl-[acyl-carrier-protein] synthase, mitochondrial                     |
| 30 | 3fqd | 9.037 | 5-3 exoribonuclease 2                                                        |
| 31 | 1fi6 | 8.889 | RalBP1-associated Eps domain-containing protein 1                            |
| 32 | 1sfk | 8.882 | Genome polyprotein                                                           |
| 33 | 1ddm | 8.824 | Protein numb                                                                 |
| 34 | 1iq3 | 8.736 | RalBP1-associated Eps domain-containing protein 2                            |
| 35 | 2j96 | 8.712 | Phycoerythrocyanin alpha chain                                               |
| 36 | 1oxy | 8.694 | Hemocyanin II                                                                |
| 37 | 3esw | 8.495 | Peptide-N(4)-(N-acetyl-beta-glucosaminyl)asparagine amidase                  |
| 38 | 1tg6 | 8.493 | Putative ATP-dependent Clp protease proteolytic subunit, mitochondrial       |
| 39 | 2e3x | 8.4   | Coagulation factor X-activating enzyme heavy chain                           |
| 40 | 1x65 | 8.276 | Cold shock domain-containing protein E1                                      |
| 41 | 1jv1 | 8.223 | UDP-N-acetylhexosamine pyrophosphorylase                                     |
| 42 | 3b6x | 8.212 | General odorant-binding protein lush                                         |
| 43 | 2uvn | 8.211 | Putative cytochrome P450 130                                                 |
| 44 | 1k44 | 8.2   | Nucleoside diphosphate kinase                                                |
| 45 | 3gh8 | 8.177 | Iodotyrosine dehalogenase 1                                                  |
| 46 | 1l6s | 8.148 | Delta-aminolevulinic acid dehydratase                                        |
| 47 | 1ya0 | 8.094 | Protein SMG7                                                                 |
| 48 | 1rso | 8.091 | Disks large homolog 1                                                        |

|    |      |       |                                                                           |
|----|------|-------|---------------------------------------------------------------------------|
| 49 | 3d3l | 8.091 | Arachidonate 12-lipoxygenase, 12S-type                                    |
| 50 | 1zte | 8.07  | Superoxide dismutase [Mn], mitochondrial                                  |
| 51 | 1xjv | 8.054 | Protection of telomeres protein 1                                         |
| 52 | 2ibm | 8.041 | Protein translocase subunit secA                                          |
| 53 | 1r8u | 8.041 | Cbp/p300-interacting transactivator 2                                     |
| 54 | 1zag | 7.992 | Zinc-alpha-2-glycoprotein                                                 |
| 55 | 1in7 | 7.976 | Holliday junction ATP-dependent DNA helicase<br>ruvB                      |
| 56 | 1nsh | 7.957 | Protein S100-A11                                                          |
| 57 | 1hm6 | 7.956 | Annexin A1                                                                |
| 58 | 1ako | 7.956 | Exodeoxyribonuclease III                                                  |
| 59 | 1p7o | 7.933 | Phospholipase A2, acidic 2                                                |
| 60 | 1cok | 7.927 | Tumor protein p73                                                         |
| 61 | 2dld | 7.885 | D-lactate dehydrogenase                                                   |
| 62 | 2ior | 7.866 | Chaperone protein htpG                                                    |
| 63 | 1x1f | 7.865 | Signal-transducing adaptor protein 1                                      |
| 64 | 2p54 | 7.86  | Peroxisome proliferator-activated receptor alpha                          |
| 65 | 1gm6 | 7.853 | Salivary lipocalin                                                        |
| 66 | 2r0n | 7.846 | Glutaryl-CoA dehydrogenase, mitochondrial                                 |
| 67 | 1tnq | 7.832 | Troponin C, skeletal muscle                                               |
| 68 | 1snl | 7.817 | Nucleobindin-1                                                            |
| 69 | 2csw | 7.813 | E3 ubiquitin-protein ligase RNF8                                          |
| 70 | 1na6 | 7.769 | Type-2 restriction enzyme EcoRII                                          |
| 71 | 3ibv | 7.76  | Exportin-T                                                                |
| 72 | 2nq5 | 7.758 | 5-methyltetrahydropteroyltriglutamate--<br>homocysteine methyltransferase |
| 73 | 2yww | 7.758 | Aspartate carbamoyltransferase regulatory chain                           |
| 74 | 1yc9 | 7.753 | Multidrug resistance protein, putative                                    |
| 75 | 1wde | 7.734 | Probable diphthine synthase                                               |

|     |      |       |                                                     |
|-----|------|-------|-----------------------------------------------------|
| 76  | 2h63 | 7.71  | Biliverdin reductase A                              |
| 77  | 3bch | 7.706 | 40S ribosomal protein SA                            |
| 78  | 2b61 | 7.704 | Homoserine O-acetyltransferase                      |
| 79  | 1win | 7.682 | Flotillin-2                                         |
| 80  | 2jpe | 7.68  | Nuclear inhibitor of protein phosphatase 1          |
| 81  | 1b7a | 7.678 | Phosphatidylethanolamine-binding protein 1          |
| 82  | 1ay5 | 7.672 | Aromatic-amino-acid aminotransferase                |
| 83  | 2qby | 7.65  | Cell division control protein 6 homolog 1           |
| 84  | 3eap | 7.638 | Rho GTPase-activating protein 11A                   |
| 85  | 1civ | 7.625 | Malate dehydrogenase [NADP], chloroplast            |
| 86  | 1vrn | 7.624 | Photosynthetic reaction center cytochrome c subunit |
| 87  | 1b8h | 7.613 | DNA polymerase processivity component               |
| 88  | 3df0 | 7.606 | Calpain-2 catalytic subunit                         |
| 89  | 1xvv | 7.58  | Crotonobetainyl-CoA:carnitine CoA-transferase       |
| 90  | 1vl7 | 7.546 | Alr5027 protein                                     |
| 91  | 2gfp | 7.539 | Multidrug resistance protein D                      |
| 92  | 1ggt | 7.53  | Coagulation factor XIII A chain                     |
| 93  | 1m0t | 7.514 | Glutathione synthetase                              |
| 94  | 1s5a | 7.51  | Hypothetical protein yesE                           |
| 95  | 1a79 | 7.507 | tRNA-splicing endonuclease                          |
| 96  | 1dc1 | 7.448 | Type-2 restriction enzyme BsoBI                     |
| 97  | 2gp6 | 7.444 | 3-oxoacyl-[acyl-carrier-protein] synthase 2         |
| 98  | 1a0h | 7.433 | Prothrombin                                         |
| 99  | 1zun | 7.43  | Sulfate adenylyltransferase subunit 2               |
| 100 | 1uv6 | 7.422 | Acetylcholine-binding protein                       |
| 101 | 1ykd | 7.416 | Adenylate cyclase                                   |
| 102 | 1gzq | 7.406 | T-cell surface glycoprotein CD1b                    |
| 103 | 1b0a | 7.405 | Bifunctional protein fold                           |



|     |          |       |                                                                      |
|-----|----------|-------|----------------------------------------------------------------------|
| 104 | 1fiz     | 7.404 | Acrosin                                                              |
| 105 | 1ahj     | 7.394 | Nitrile hydratase subunit alpha                                      |
| 106 | 2vw5     | 7.374 | ATP-dependent molecular chaperone HSP82                              |
| 107 | 2cpt     | 7.37  | Vacuolar protein sorting-associated protein 4B                       |
| 108 | 2hcb     | 7.368 | Chromosomal replication initiator protein dnaA                       |
| 109 | 2qtv     | 7.351 | Protein transport protein SEC23                                      |
| 110 | 1p32     | 7.348 | Complement component 1 Q subcomponent-binding protein, mitochondrial |
| 111 | 2hvb     | 7.347 | Superoxide reductase                                                 |
| 112 | 3eay     | 7.345 | Sentrin-specific protease 7                                          |
| 113 | 1r2j     | 7.343 | FkbI                                                                 |
| 114 | 2qxl     | 7.34  | Heat shock protein homolog SSE1                                      |
| 115 | 2bjh     | 7.335 | Feruloyl esterase A                                                  |
| 116 | 2czy     | 7.332 | Paired amphipathic helix protein Sin3b                               |
| 117 | 1vap     | 7.327 | Phospholipase A2                                                     |
| 118 | 2gsq     | 7.324 | Glutathione S-transferase                                            |
| 119 | 1ow1     | 7.322 | Msx2-interacting protein                                             |
| 120 | 1lrw     | 7.32  | Methanol dehydrogenase subunit 1                                     |
| 121 | 3epm     | 7.319 | Thiamine biosynthesis protein thiC                                   |
| 122 | 1asq     | 7.316 | L-ascorbate oxidase                                                  |
| 123 | 1rp1     | 7.316 | Pancreatic lipase-related protein 1                                  |
| 124 | 1ix1     | 7.31  | Peptide deformylase                                                  |
| 125 | 1aj8     | 7.295 | Citrate synthase                                                     |
| 126 | 2j47     | 7.292 | O-GlcNAcase BT_4395                                                  |
| 127 | 1wxr     | 7.286 | Hemoglobin-binding protease hbp                                      |
| 128 | 2.00E+55 | 7.277 | Uracil phosphoribosyltransferase                                     |
| 129 | 1lnl     | 7.272 | Hemocyanin type 2 unit e                                             |
| 130 | 1q1h     | 7.272 | Transcription factor E                                               |

|     |      |       |                                                                            |
|-----|------|-------|----------------------------------------------------------------------------|
| 131 | 2k8y | 7.27  | Uncharacterized protein MJ0187                                             |
| 132 | 1wh0 | 7.267 | Ubiquitin carboxyl-terminal hydrolase 19                                   |
| 133 | 1wru | 7.266 | Baseplate protein                                                          |
| 134 | 1k1d | 7.264 | D-hydantoinase                                                             |
| 135 | 1vcn | 7.261 | CTP synthase                                                               |
| 136 | 1spu | 7.261 | Primary amine oxidase                                                      |
| 137 | 3dra | 7.248 | Protein farnesyltransferase/geranylgeranyltransferase type-1 subunit alpha |
| 138 | 2a98 | 7.246 | Inositol-trisphosphate 3-kinase C                                          |
| 139 | 1z45 | 7.241 | GAL10 bifunctional protein [Includes: UDP-glucose 4-epimerase]             |
| 140 | 1t90 | 7.24  | Methylmalonate semialdehyde dehydrogenase [acylating]                      |
| 141 | 1z9f | 7.238 | Single-stranded DNA-binding protein                                        |
| 142 | 2ikq | 7.234 | Ubiquitin-associated and SH3 domain-containing protein B                   |
| 143 | 1qe0 | 7.233 | Histidyl-tRNA synthetase                                                   |
| 144 | 1d5y | 7.233 | Right origin-binding protein                                               |
| 145 | 1sq1 | 7.233 | Chorismate synthase                                                        |
| 146 | 2qv6 | 7.231 | GTP cyclohydrolase III                                                     |
| 147 | 1uh6 | 7.227 | Ubiquitin-like protein 5                                                   |
| 148 | 1k9k | 7.227 | Protein S100-A6                                                            |
| 149 | 1m1j | 7.224 | Fibrinogen alpha chain                                                     |
| 150 | 1j3x | 7.224 | High mobility group protein B2                                             |
| 151 | 1qwo | 7.222 | 3-phytase A                                                                |
| 152 | 1xge | 7.218 | Dihydroorotase                                                             |
| 153 | 1i11 | 7.218 | Transcription factor SOX-5                                                 |
| 154 | 1fy7 | 7.214 | Histone acetyltransferase ESA1                                             |
| 155 | 1vhd | 7.212 | Alcohol dehydrogenase, iron-containing                                     |

|     |      |       |                                                                                               |
|-----|------|-------|-----------------------------------------------------------------------------------------------|
| 156 | 2ee4 | 7.203 | Rho GTPase-activating protein 5                                                               |
| 157 | 1hty | 7.203 | Alpha-mannosidase 2                                                                           |
| 158 | 2f66 | 7.203 | Suppressor protein STP22 of temperature-sensitive alpha-factor receptor and arginine permease |
| 159 | 2a9e | 7.202 | Catalase                                                                                      |
| 160 | 2daf | 7.183 | IQ and ubiquitin-like domain-containing protein                                               |
| 161 | 1j7x | 7.182 | Retinol-binding protein 3                                                                     |
| 162 | 1esj | 7.179 | Hydroxyethylthiazole kinase                                                                   |

**Table S8.** The docking scores, binding free energies ( $\Delta G_{\text{Binding}}$ ) in kcal/mol, and the average RMSDs in Å of the generated 10 poses of forskolin.

| Pose number | Docking score | $\Delta G_{\text{Binding}}^*$ | average RMSD <sup>#</sup> |
|-------------|---------------|-------------------------------|---------------------------|
| 1           | -10.37        | -8.33                         | 1.87                      |
| 2           | -9.78         | -8.16                         | 1.97                      |
| 3           | -9.63         | -7.68                         | 2.47                      |
| 4           | -9.61         | -7.37                         | 2.59                      |
| 5           | -9.48         | -7.44                         | 2.69                      |
| 6           | -9.32         | -7.28                         | 2.63                      |
| 7           | -9.28         | -7.21                         | 2.91                      |
| 8           | -9.21         | -7.17                         | 2.46                      |
| 9           | -9.18         | -7.15                         | 2.28                      |
| 10          | -9.11         | -7.18                         | 2.23                      |

\* and # the calculated binding free energies and RMSD were based on 30 ns-long MD simulations
